# Supplementary material for: An NMR-Based Model to Investigate the Metabolic Phenoreversion of COVID-19 Patients throughout a Longitudinal Study
Source: MDPI journal article supplement (doi:10.3390/metabo12121206), 2022-12-01

**Table S1.** General characteristics and metadata for the different cohorts of COVID hospitalized patients whose disease onset was in 2020. Recovery phase (RE0) is divided by days after the disease onset.

|                                           | AC0         | RE0         |             |             |             |             |      |
|-------------------------------------------|-------------|-------------|-------------|-------------|-------------|-------------|------|
|                                           | Acute phase | (0,7]       | (7,14]      | (14,30]     | (30,60]     | >60         | N    |
|                                           | N=697       | N=139       | N=96        | N=104       | N=134       | N=37        |      |
| <b>General</b>                            |             |             |             |             |             |             |      |
| Age (years)                               | 67.5 (16.4) | 68.3 (13.6) | 69.0 (16.4) | 67.1 (13.4) | 65.8 (12.5) | 68.3 (13.7) | 1207 |
| Gender (female, n)                        | 319 (45.8%) | 51 (36.7%)  | 38 (39.6%)  | 34 (32.7%)  | 45 (33.6%)  | 14 (37.8%)  | 1207 |
| <b>COVID</b>                              |             |             |             |             |             |             |      |
| COVID vaccine dosis                       |             |             |             |             |             |             | 1207 |
| 0                                         | 697 (100%)  | 139 (100%)  | 96 (100%)   | 104 (100%)  | 134 (100%)  | 36 (97.3%)  |      |
| 1                                         | 0 (0.00%)   | 0 (0.00%)   | 0 (0.00%)   | 0 (0.00%)   | 0 (0.00%)   | 0 (0.00%)   |      |
| 2                                         | 0 (0.00%)   | 0 (0.00%)   | 0 (0.00%)   | 0 (0.00%)   | 0 (0.00%)   | 1 (2.70%)   |      |
| Hospital severity criteria                |             |             |             |             |             |             | 822  |
| mild-moderate                             | 262 (84.0%) | 116 (83.5%) | 86 (89.6%)  | 81 (77.9%)  | 103 (76.9%) | 21 (56.8%)  |      |
| severe                                    | 50 (16.0%)  | 23 (16.5%)  | 10 (10.4%)  | 23 (22.1%)  | 31 (23.1%)  | 16 (43.2%)  |      |
| <b>Medical history</b>                    |             |             |             |             |             |             |      |
| Cancer                                    | 17 (12.8%)  | 4 (7.14%)   | 10 (11.2%)  | 8 (10.7%)   | 2 (11.1%)   | 0 (%)       | 371  |
| Cardiovascular disease                    | 157 (22.8%) | 24 (17.3%)  | 18 (18.8%)  | 22 (21.2%)  | 20 (14.9%)  | 4 (10.8%)   | 1200 |
| Cerebrovascular disease                   | 58 (8.41%)  | 8 (5.76%)   | 2 (2.08%)   | 2 (1.92%)   | 11 (8.21%)  | 4 (10.8%)   | 1200 |
| Chronic kidney disease                    | 20 (15.0%)  | 7 (12.5%)   | 8 (8.99%)   | 10 (13.3%)  | 0 (0.00%)   | 0 (%)       | 371  |
| Chronic obstructive pulmonary disease     | 51 (7.39%)  | 11 (7.91%)  | 6 (6.25%)   | 4 (3.85%)   | 10 (7.46%)  | 1 (2.70%)   | 1200 |
| Diabetes                                  | 129 (18.7%) | 21 (15.1%)  | 16 (16.7%)  | 27 (26.0%)  | 13 (9.70%)  | 6 (16.2%)   | 1200 |
| Digestive disease                         | 15 (11.3%)  | 5 (8.93%)   | 12 (13.5%)  | 9 (12.0%)   | 0 (0.00%)   | 0 (%)       | 371  |
| Hepatitis B hevirus                       | 1 (0.27%)   | 0 (%)       | 0 (%)       | 0 (%)       | 0 (%)       | 0 (%)       | 377  |
| Hypertension                              | 317 (45.9%) | 69 (49.6%)  | 49 (51.0%)  | 58 (55.8%)  | 52 (38.8%)  | 17 (45.9%)  | 1200 |
| Immunodeficiency                          | 18 (3.23%)  | 1 (1.20%)   | 1 (14.3%)   | 1 (3.45%)   | 1 (0.86%)   | 2 (5.41%)   | 829  |
| Immunosuppression                         | 7 (5.26%)   | 4 (7.14%)   | 6 (6.74%)   | 0 (0.00%)   | 0 (0.00%)   | 0 (%)       | 371  |
| Kidney failure                            | 12 (3.83%)  | 6 (4.32%)   | 7 (7.29%)   | 8 (7.69%)   | 4 (2.99%)   | 2 (5.41%)   | 823  |
| Liver failure                             | 9 (1.62%)   | 1 (1.20%)   | 0 (0.00%)   | 1 (3.45%)   | 1 (0.86%)   | 0 (0.00%)   | 829  |
| Lymphadenopathy                           | 0 (0.00%)   | 0 (0.00%)   | 0 (0.00%)   | 0 (0.00%)   | 0 (0.00%)   | 0 (0.00%)   | 452  |
| Neoplasm                                  | 39 (9.07%)  | 5 (6.02%)   | 1 (14.3%)   | 1 (3.45%)   | 6 (5.17%)   | 1 (2.70%)   | 702  |
| Obesity                                   | 16 (12.1%)  | 6 (10.7%)   | 10 (11.2%)  | 14 (18.7%)  | 5 (27.8%)   | 0 (%)       | 370  |
| Renal insufficiency                       | 28 (7.43%)  | 0 (%)       | 0 (%)       | 0 (%)       | 0 (%)       | 0 (%)       | 377  |
| <b>Biochemical</b>                        |             |             |             |             |             |             |      |
| Albumin (g/dL)                            | 3.72 (0.46) | 3.40 (0.51) | 2.90 (.)    | 3.97 (0.35) | 4.25 (0.88) | 3.78 (1.73) | 366  |
| Alanine transaminase (U/L)                | 39.4 (41.6) | 56.3 (42.5) | 75.7 (31.0) | 28.7 (7.81) | 24.4 (10.8) | 38.6 (57.2) | 605  |
| Activated partial thromboplastin time (s) | 24.4 (4.94) | -           | -           | -           | -           | -           | 245  |
| Aspartate transaminase (U/L)              | 59.6 (39.5) | 61.0 (32.0) | 37.5 (19.1) | 22.6 (9.81) | 21.1 (8.36) | 23.0 (6.97) | 285  |
| Bilirubin (mg/dL)                         | 0.55 (0.36) | 0.43 (0.23) | 0.37 (0.06) | 0.40 (0.12) | 0.71 (0.44) | 0.61 (0.32) | 467  |
| C-reactive protein (mg/L)                 | 74.4 (67.7) | 39.4 (37.7) | 17.8 (16.1) | 3.83 (5.09) | 6.72 (17.2) | 3.75 (7.44) | 758  |
| Creatine kinase (U/L)                     | 115 (156)   | 98.7 (201)  | 30.0 (12.2) | -           | 67.9 (42.5) | 72.1 (54.8) | 271  |
| Creatine phosphokinase (U/L)              | 134 (227)   | -           | -           | -           | -           | -           | 288  |
| Creatinine (mg/dL)                        | 0.96 (0.48) | 0.85 (0.32) | 0.66 (0.20) | 1.07 (0.37) | 0.82 (0.19) | 0.84 (0.25) | 613  |
| D-dimer (ng/mL)                           | 1824 (6768) | 1067 (1680) | 743 (229)   | 757 (489)   | 748 (1356)  | 915 (983)   | 722  |
| Ferritin (ng/mL)                          | 775 (799)   | 1293 (1113) | 886 (475)   | 408 (274)   | 279 (240)   | 202 (201)   | 707  |
| Glucose (mg/dL)                           | 139 (93.2)  | 133 (58.1)  | 122 (51.8)  | 119 (35.0)  | 113 (36.5)  | 109 (40.3)  | 549  |
| Interleukin-6 (pg/mL)                     | 18.8 (23.9) | 748 (1005)  | -           | -           | -           | -           | 15   |
| Lactate dehydrogenase (U/L)               | 303 (164)   | 314 (94.0)  | 285 (148)   | 207 (31.1)  | 207 (44.4)  | 208 (56.5)  | 729  |
| Leukocytes (10 <sup>9</sup> /L)           | 99.5 (925)  | 7.53 (3.31) | 8.57 (2.40) | 6.02 (1.73) | 7.35 (3.83) | 6.81 (1.59) | 760  |
| Lymphocytes (10 <sup>9</sup> /L)          | 14.7 (142)  | 1.16 (0.66) | 1.14 (0.43) | 2.21 (0.83) | 2.32 (1.01) | 2.25 (0.72) | 759  |
| Monocytes (10 <sup>9</sup> /L)            | 0.43 (0.24) | 0.56 (0.59) | 0.65 (0.59) | 0.55 (0.15) | 0.78 (0.98) | 0.61 (0.15) | 691  |
| Neutrophils (10 <sup>9</sup> /L)          | 79.9 (774)  | 5.79 (3.05) | 6.72 (1.98) | 2.99 (1.57) | 4.07 (2.41) | 3.70 (1.18) | 757  |
| Platelets (10 <sup>9</sup> /L)            | 221 (100)   | 259 (98.3)  | 328 (97.1)  | 211 (57.6)  | 254 (78.3)  | 224 (66.2)  | 754  |

|                                              | AC0         |             |             | RE0         |             |             |      |
|----------------------------------------------|-------------|-------------|-------------|-------------|-------------|-------------|------|
|                                              | Acute phase | (0,7]       | (7,14]      | (14,30]     | (30,60]     | >60         | N    |
| Procalcitonin (ng/mL)                        | 1.20 (11.5) | 0.66 (3.85) | 0.07 (0.01) | 0.05 (0.02) | 0.06 (0.04) | 0.05 (0.03) | 569  |
| Protein (g/dL)                               | 6.31 (0.72) | 6.50 (0.14) | -           | 6.85 (0.47) | 6.64 (0.40) | 6.22 (0.93) | 166  |
| Prothrombin activity (%)                     | 88.5 (19.9) | 87.7 (15.3) | 85.0 (30.0) | 26.0 (.)    | 97.2 (4.35) | 93.6 (16.5) | 558  |
| Urea (mg/dL)                                 | 44.2 (25.4) | 50.4 (24.6) | 45.3 (15.5) | 42.2 (25.2) | 34.6 (15.5) | 41.3 (16.7) | 553  |
| <b>Hospitalization events and treatments</b> |             |             |             |             |             |             |      |
| Acute respiratory distress syndrome          | 12 (9.02%)  | 8 (14.3%)   | 8 (8.99%)   | 17 (22.7%)  | 6 (33.3%)   | 0 (.)       | 371  |
| Bilateral alveolar infiltrates               | 103 (77.4%) | 46 (82.1%)  | 68 (76.4%)  | 64 (85.3%)  | 18 (100%)   | 0 (.)       | 371  |
| Continuous Positive Airway Pressure          | 13 (2.52%)  | 0 (0.00%)   | 0 (0.00%)   | 0 (.)       | 0 (.)       | 0 (.)       | 604  |
| CURB-65                                      | 0.92 (0.95) | -           | -           | -           | -           | -           | 106  |
| Extracorporeal membrane oxygenation          | 1 (0.47%)   | 0 (.)       | 0 (.)       | 0 (.)       | 0 (.)       | 0 (.)       | 213  |
| Hemofiltration                               | 2 (0.95%)   | 0 (.)       | 0 (.)       | 0 (.)       | 0 (.)       | 0 (.)       | 211  |
| High-flow oxygen therapy                     | 36 (20.0%)  | 17 (20.5%)  | 3 (42.9%)   | 3 (10.3%)   | 21 (18.1%)  | 16 (43.2%)  | 452  |
| High flow nasal cannula                      | 53 (10.3%)  | 11 (13.3%)  | 1 (20.0%)   | 0 (.)       | 0 (.)       | 0 (.)       | 604  |
| Intensive care unit required                 | 47 (22.0%)  | 5 (6.02%)   | 2 (28.6%)   | 2 (6.90%)   | 3 (2.59%)   | 9 (24.3%)   | 486  |
| Interstitial infiltrates                     | 1 (0.75%)   | 1 (1.79%)   | 2 (2.25%)   | 2 (2.67%)   | 0 (0.00%)   | 0 (.)       | 371  |
| Intubation days                              | 23.1 (17.9) | -           | -           | -           | -           | -           | 24   |
| Dead                                         | 38 (9.90%)  | 0 (.)       | 0 (.)       | 0 (.)       | 0 (.)       | 0 (.)       | 384  |
| Mechanic ventilation                         | 3 (2.26%)   | 1 (1.79%)   | 4 (4.49%)   | 9 (12.0%)   | 9 (50.0%)   | 0 (.)       | 371  |
| Multi organic failure                        | 0 (0.00%)   | 0 (0.00%)   | 0 (0.00%)   | 0 (0.00%)   | 0 (0.00%)   | 0 (.)       | 371  |
| Nasal cannulas                               | 271 (51.1%) | 12 (14.5%)  | 2 (40.0%)   | 0 (.)       | 0 (.)       | 0 (.)       | 618  |
| Number of hospital days                      | 9.52 (13.8) | 9.87 (13.4) | 12.3 (5.47) | 6.24 (3.19) | 7.95 (10.7) | 12.8 (11.2) | 836  |
| Orotracheal intubation                       | 5 (2.81%)   | 1 (1.20%)   | 0 (0.00%)   | 0 (.)       | 0 (.)       | 0 (.)       | 266  |
| Oxygen therapy                               | 120 (67.4%) | 20 (24.1%)  | 2 (40.0%)   | 0 (.)       | 0 (.)       | 0 (.)       | 266  |
| Pneumonia:                                   |             |             |             |             |             |             | 693  |
| bilateral                                    | 328 (77.9%) | 76 (91.6%)  | 7 (100%)    | 26 (89.7%)  | 103 (88.8%) | 33 (89.2%)  |      |
| normal                                       | 45 (10.7%)  | 4 (4.82%)   | 0 (0.00%)   | 0 (0.00%)   | 2 (1.72%)   | 1 (2.70%)   |      |
| unilateral                                   | 48 (11.4%)  | 3 (3.61%)   | 0 (0.00%)   | 3 (10.3%)   | 11 (9.48%)  | 3 (8.11%)   |      |
| SOFA score                                   | 2.37 (3.71) | -           | -           | -           | -           | -           | 19   |
| Unilateral alveolar infiltrates              | 12 (9.02%)  | 3 (5.36%)   | 7 (7.87%)   | 5 (6.67%)   | 0 (0.00%)   | 0 (.)       | 371  |
| Venturi mask                                 | 83 (15.8%)  | 3 (3.61%)   | 1 (20.0%)   | 0 (.)       | 0 (.)       | 0 (.)       | 614  |
| <b>Measures at hospitalization</b>           |             |             |             |             |             |             |      |
| Breathing frequency (n/min)                  | 21.7 (8.02) | 15.3 (2.31) | -           | -           | 13.3 (1.15) | 18.0 (.)    | 72   |
| Diastolic blood pressure (mmHg)              | 77.3 (13.4) | 75.0 (10.3) | 68.6 (10.4) | 75.9 (11.1) | 73.6 (16.5) | 78.6 (13.9) | 678  |
| Heart rate (n/min)                           | 89.7 (17.7) | 86.5 (17.0) | 75.7 (10.5) | 90.6 (17.6) | 87.9 (17.0) | 86.2 (17.1) | 690  |
| Systolic blood pressure (mmHg)               | 132 (21.7)  | 128 (18.0)  | 126 (21.0)  | 122 (14.6)  | 127 (18.8)  | 133 (20.5)  | 688  |
| Temperature (°C)                             | 36.6 (0.87) | 36.8 (0.77) | 37.1 (0.76) | 37.0 (0.66) | 36.9 (0.84) | 36.6 (0.59) | 686  |
| <b>Symptoms at hospitalization</b>           |             |             |             |             |             |             |      |
| Ageusia                                      | 1 (0.75%)   | 1 (1.79%)   | 0 (0.00%)   | 0 (0.00%)   | 0 (0.00%)   | 0 (.)       | 371  |
| Anosmia                                      | 1 (0.75%)   | 1 (1.79%)   | 0 (0.00%)   | 0 (0.00%)   | 0 (0.00%)   | 0 (.)       | 371  |
| Arthralgia                                   | 0 (0.00%)   | 0 (0.00%)   | 0 (0.00%)   | 0 (0.00%)   | 0 (0.00%)   | 0 (.)       | 371  |
| Asthenia                                     | 7 (5.26%)   | 2 (3.57%)   | 3 (3.37%)   | 0 (0.00%)   | 0 (0.00%)   | 0 (.)       | 371  |
| Clouding of consciousness                    | 19 (7.60%)  | 0 (.)       | 0 (.)       | 0 (.)       | 0 (.)       | 0 (.)       | 250  |
| Conjunctival congestion                      | 2 (0.47%)   | 0 (0.00%)   | 0 (0.00%)   | 0 (0.00%)   | 0 (0.00%)   | 0 (0.00%)   | 702  |
| Cough                                        | 112 (62.2%) | 54 (65.1%)  | 1 (14.3%)   | 18 (62.1%)  | 76 (65.5%)  | 23 (62.2%)  | 452  |
| Diarrhea                                     | 80 (20.9%)  | 2 (3.57%)   | 6 (6.74%)   | 5 (6.67%)   | 1 (5.56%)   | 0 (.)       | 621  |
| Disorientation                               | 30 (5.46%)  | 4 (4.82%)   | 0 (0.00%)   | 0 (0.00%)   | 3 (2.59%)   | 2 (5.41%)   | 821  |
| Dry cough                                    | 146 (38.1%) | 4 (7.14%)   | 8 (8.99%)   | 0 (0.00%)   | 0 (0.00%)   | 0 (.)       | 621  |
| Dyspnoea                                     | 15 (11.3%)  | 5 (8.93%)   | 11 (12.4%)  | 3 (4.00%)   | 0 (0.00%)   | 0 (.)       | 371  |
| Expectoration                                | 7 (5.26%)   | 0 (0.00%)   | 7 (7.87%)   | 2 (2.67%)   | 0 (0.00%)   | 0 (.)       | 371  |
| Fatigue                                      | 190 (44.2%) | 15 (18.1%)  | 2 (28.6%)   | 8 (27.6%)   | 28 (24.1%)  | 10 (27.0%)  | 702  |
| Fever                                        | 341 (60.6%) | 78 (56.1%)  | 21 (21.9%)  | 31 (29.8%)  | 97 (72.4%)  | 29 (78.4%)  | 1073 |
| Headache                                     | 72 (12.8%)  | 8 (5.76%)   | 1 (1.04%)   | 3 (2.88%)   | 16 (11.9%)  | 2 (5.41%)   | 1073 |
| Hemoptysis                                   | 1 (0.23%)   | 0 (0.00%)   | 0 (0.00%)   | 0 (0.00%)   | 0 (0.00%)   | 0 (0.00%)   | 702  |
| Loss of consciousness                        | 4 (2.22%)   | 3 (3.61%)   | 0 (0.00%)   | 0 (0.00%)   | 3 (2.59%)   | 1 (2.70%)   | 452  |

|                          | AC0            | RE0        |           |            |            |           |      |
|--------------------------|----------------|------------|-----------|------------|------------|-----------|------|
|                          | Acute<br>phase | (0,7]      | (7,14]    | (14,30]    | (30,60]    | >60       | N    |
| Lymphadenopathy          | 2 (0.80%)      | 0 (.)      | 0 (.)     | 0 (.)      | 0 (.)      | 0 (.)     | 250  |
| Myalgia                  | 119 (21.1%)    | 16 (11.5%) | 7 (7.29%) | 12 (11.5%) | 24 (17.9%) | 7 (18.9%) | 1073 |
| Nasal congestion         | 17 (3.02%)     | 3 (2.16%)  | 0 (0.00%) | 1 (0.96%)  | 2 (1.49%)  | 3 (8.11%) | 1073 |
| Nausea                   | 12 (6.67%)     | 6 (7.23%)  | 0 (0.00%) | 2 (6.90%)  | 7 (6.03%)  | 4 (10.8%) | 452  |
| Nausea vomiting          | 40 (10.5%)     | 0 (0.00%)  | 2 (2.25%) | 0 (0.00%)  | 0 (0.00%)  | 0 (.)     | 620  |
| Odynophagia              | 44 (10.2%)     | 8 (9.64%)  | 0 (0.00%) | 4 (13.8%)  | 9 (7.76%)  | 0 (0.00%) | 702  |
| Oropharyngeal congestion | 6 (1.40%)      | 3 (3.61%)  | 0 (0.00%) | 0 (0.00%)  | 4 (3.45%)  | 0 (0.00%) | 702  |
| Productive cough         | 55 (22.0%)     | 0 (.)      | 0 (.)     | 0 (.)      | 0 (.)      | 0 (.)     | 250  |
| Shaking chills           | 75 (13.3%)     | 19 (13.7%) | 0 (0.00%) | 4 (3.85%)  | 9 (6.72%)  | 4 (10.8%) | 1073 |
| Skin rash                | 3 (1.20%)      | 0 (.)      | 0 (.)     | 0 (.)      | 0 (.)      | 0 (.)     | 250  |
| Sore throat              | 1 (0.75%)      | 0 (0.00%)  | 0 (0.00%) | 0 (0.00%)  | 0 (0.00%)  | 0 (.)     | 371  |
| Tonsil inflammation      | 0 (0.00%)      | 0 (.)      | 0 (.)     | 0 (.)      | 0 (.)      | 0 (.)     | 250  |
| Vomiting                 | 15 (8.33%)     | 6 (7.23%)  | 0 (0.00%) | 1 (3.45%)  | 10 (8.62%) | 4 (10.8%) | 452  |

**Table S2.** General characteristics and metadata for the different cohorts of COVID hospitalized patients whose disease onset was in 2021. Recovery phase (RE1) is divided by days after the disease onset.

|                                       | AC1         | RE1         |              |             |                |             |     |
|---------------------------------------|-------------|-------------|--------------|-------------|----------------|-------------|-----|
|                                       | Acute phase | (0,7]       | (7,14]       | (14,30]     | (30,60]        | >60         | N   |
|                                       | N=189       | N=100       | N=1          | N=15        | N=121          | N=52        |     |
| <b>General</b>                        |             |             |              |             |                |             |     |
| Age (years)                           | 61.4 (13.7) | 62.9 (13.7) | 70.0 (.)     | 61.9 (12.9) | 62.9 (12.9)    | 57.4 (15.0) | 478 |
| Gender (female, n)                    | 69 (36.5%)  | 36 (36.0%)  | 0<br>(0.00%) | 5 (33.3%)   | 44 (36.4%)     | 21 (40.4%)  | 478 |
| <b>COVID</b>                          |             |             |              |             |                |             |     |
| COVID vaccine dosis                   |             |             |              |             |                |             | 478 |
| 0                                     | 183 (96.8%) | 98 (98.0%)  | 1 (100%)     | 15 (100%)   | 108<br>(89.3%) | 48 (92.3%)  |     |
| 1                                     | 6 (3.17%)   | 2 (2.00%)   | 0<br>(0.00%) | 0 (0.00%)   | 7 (5.79%)      | 4 (7.69%)   |     |
| 2                                     | 0 (0.00%)   | 0 (0.00%)   | 0<br>(0.00%) | 0 (0.00%)   | 6 (4.96%)      | 0 (0.00%)   |     |
| Hospital severity criteria            |             |             |              |             |                |             | 478 |
| mild-moderate                         | 146 (77.2%) | 77 (77.0%)  | 1 (100%)     | 11 (73.3%)  | 109<br>(90.1%) | 26 (50.0%)  |     |
| severe                                | 43 (22.8%)  | 23 (23.0%)  | 0<br>(0.00%) | 4 (26.7%)   | 12 (9.92%)     | 26 (50.0%)  |     |
| <b>Medical history</b>                |             |             |              |             |                |             |     |
| Cardiovascular disease                | 22 (11.6%)  | 13 (13.0%)  | 0<br>(0.00%) | 1 (6.67%)   | 18 (14.9%)     | 3 (5.77%)   | 478 |
| Cerebrovascular disease               | 10 (5.29%)  | 7 (7.00%)   | 0<br>(0.00%) | 0 (0.00%)   | 8 (6.61%)      | 2 (3.85%)   | 478 |
| Chronic obstructive pulmonary disease | 6 (3.17%)   | 6 (6.00%)   | 0<br>(0.00%) | 1 (6.67%)   | 4 (3.31%)      | 1 (1.92%)   | 478 |
| Diabetes                              | 31 (16.4%)  | 17 (17.0%)  | 0<br>(0.00%) | 5 (33.3%)   | 19 (15.7%)     | 5 (9.62%)   | 478 |
| Hypertension                          | 66 (34.9%)  | 36 (36.0%)  | 1 (100%)     | 3 (20.0%)   | 47 (38.8%)     | 15 (28.8%)  | 478 |
| Immunodeficiency                      | 3 (1.59%)   | 2 (2.00%)   | 0<br>(0.00%) | 1 (6.67%)   | 1 (0.83%)      | 1 (1.92%)   | 478 |
| Kidney failure                        | 4 (2.12%)   | 4 (4.00%)   | 0<br>(0.00%) | 1 (6.67%)   | 2 (1.65%)      | 1 (1.92%)   | 478 |
| Liver failure                         | 4 (2.12%)   | 1 (1.00%)   | 0<br>(0.00%) | 1 (6.67%)   | 2 (1.65%)      | 1 (1.92%)   | 478 |
| Lymphadenopathy                       | 0 (0.00%)   | 0 (0.00%)   | 0<br>(0.00%) | 0 (0.00%)   | 0 (0.00%)      | 0 (0.00%)   | 478 |
| Neoplasm                              | 12 (6.35%)  | 8 (8.00%)   | 1 (100%)     | 0 (0.00%)   | 7 (5.79%)      | 4 (7.69%)   | 478 |
| <b>Biochemical</b>                    |             |             |              |             |                |             |     |
| Albumin (g/dL)                        | 3.83 (0.31) | 3.52 (0.62) | -            | 3.96 (0.26) | 4.55 (0.94)    | 4.56 (0.34) | 353 |
| Alanine transaminase (U/L)            | 47.5 (68.6) | 69.1 (148)  | -            | 35.0 (11.5) | 24.8 (19.4)    | 26.0 (18.3) | 399 |
| Aspartate transaminase (U/L)          | 61.3 (89.2) | 81.9 (143)  | 21.0 (.)     | 20.4 (5.58) | 21.9 (9.66)    | 22.7 (9.85) | 160 |
| Bilirubin (mg/dL)                     | 0.53 (0.51) | 0.94 (1.46) | -            | 0.80 (0.44) | 0.65 (0.23)    | 0.50 (0.41) | 167 |
| C-reactive protein (mg/L)             | 60.4 (50.1) | 29.3 (29.7) | 2.50 (-)     | 4.46 (2.94) | 7.06 (17.4)    | 3.97 (4.71) | 461 |
| Creatine kinase (U/L)                 | 96.0 (92.9) | 47.4 (38.0) | -            | 47.7 (24.5) | 75.3 (44.8)    | 95.4 (47.7) | 362 |
| Creatinine (mg/dL)                    | 0.85 (0.75) | 0.75 (0.19) | -            | 0.99 (0.22) | 1.87 (9.14)    | 0.84 (0.21) | 403 |
| D-dimer (ng/mL)                       | 1120 (4516) | 979 (1166)  | 950 (.)      | 407 (192)   | 588 (490)      | 467 (453)   | 254 |
| Ferritin (ng/mL)                      | 964 (1007)  | 1496 (1426) | 857 (.)      | 412 (427)   | 253 (183)      | 203 (242)   | 234 |
| Glucose (mg/dL)                       | 143 (63.2)  | 125 (55.1)  | -            | 127 (55.7)  | 114 (30.7)     | 113 (48.6)  | 396 |
| Interleukin-6 (pg/mL)                 | 37.5 (55.4) | 34.7 (66.2) | -            | 5.00 (.)    | -              | 6.00 (.)    | 25  |
| Lactate dehydrogenase (U/L)           | 299 (86.4)  | 285 (99.9)  | 234 (.)      | 226 (55.8)  | 201 (46.5)     | 195 (31.1)  | 444 |
| Leukocytes (10 <sup>9</sup> /L)       | 7.51 (7.23) | 8.72 (7.34) | 6.66 (.)     | 6.66 (1.91) | 7.23 (6.96)    | 6.56 (1.63) | 462 |
| Lymphocytes (10 <sup>9</sup> /L)      | 1.46 (5.65) | 1.95 (5.84) | 3.74 (.)     | 2.07 (0.54) | 4.29 (19.5)    | 2.18 (0.77) | 462 |
| Monocytes (10 <sup>9</sup> /L)        | 0.50 (0.75) | 0.57 (0.27) | 0.70 (.)     | 0.69 (0.32) | 0.63 (0.26)    | 0.55 (0.14) | 462 |

|                                              | AC1         |             |           | RE1         |             |             |     |
|----------------------------------------------|-------------|-------------|-----------|-------------|-------------|-------------|-----|
|                                              | Acute phase | (0,7]       | (7,14]    | (14,30]     | (30,60]     | >60         | N   |
| Neutrophils (10 <sup>9</sup> /L)             | 7.21 (18.4) | 6.16 (2.97) | 2.04 (.)  | 3.72 (1.62) | 3.80 (1.81) | 3.62 (1.19) | 462 |
| Platelets (10 <sup>9</sup> /L)               | 225 (96.3)  | 262 (108)   | 316 (.)   | 166 (68.5)  | 250 (71.5)  | 244 (75.2)  | 462 |
| Procalcitonin (ng/mL)                        | 0.16 (0.43) | 0.07 (0.07) | 0.06 (.)  | 0.05 (0.02) | 0.04 (0.03) | 0.04 (0.03) | 434 |
| Protein (g/dL)                               | 5.90 (1.26) | 5.65 (0.35) | -         | 6.60 (0.85) | 6.88 (0.49) | 6.65 (0.49) | 27  |
| Prothrombin activity (%)                     | 91.5 (17.8) | 93.6 (15.3) | -         | 96.0 (6.93) | 91.6 (21.2) | 95.9 (7.10) | 371 |
| Urea (mg/dL)                                 | 40.8 (17.0) | 46.6 (18.5) | -         | 42.8 (24.5) | 32.9 (10.4) | 34.8 (11.8) | 401 |
| <b>Hospitalization events and treatments</b> |             |             |           |             |             |             |     |
| Acute respiratory distress syndrome          | 2 (1.06%)   | 0 (0.00%)   | 0 (.)     | 0 (0.00%)   | 0 (.)       | 0 (.)       | 287 |
| High-flow oxygen therapy                     | 43 (22.8%)  | 23 (23.0%)  | 0 (0.00%) | 4 (26.7%)   | 12 (9.92%)  | 26 (50.0%)  | 478 |
| High flow nasal cannula                      | 42 (22.2%)  | 19 (19.6%)  | 0 (.)     | 1 (100%)    | 0 (.)       | 0 (.)       | 287 |
| Intensive care unit required                 | 28 (14.8%)  | 17 (17.0%)  | 0 (0.00%) | 3 (20.0%)   | 6 (4.96%)   | 18 (34.6%)  | 478 |
| Nasal cannulas                               | 149 (78.8%) | 40 (41.2%)  | 0 (.)     | 1 (100%)    | 0 (.)       | 0 (.)       | 287 |
| Number of hospital days                      | 8.54 (9.17) | 9.73 (11.2) | 4.00 (.)  | 10.0 (7.92) | 6.82 (8.20) | 11.6 (9.20) | 478 |
| Orotracheal intubation                       | 5 (2.65%)   | 1 (1.03%)   | 0 (.)     | 1 (100%)    | 0 (.)       | 0 (.)       | 287 |
| Oxygen therapy                               | 151 (79.9%) | 42 (43.3%)  | 0 (.)     | 1 (100%)    | 0 (.)       | 0 (.)       | 287 |
| Pneumonia:                                   |             |             |           |             |             |             | 478 |
| bilateral                                    | 161 (85.2%) | 78 (78.0%)  | 1 (100%)  | 14 (93.3%)  | 97 (80.2%)  | 49 (94.2%)  |     |
| normal                                       | 5 (2.65%)   | 3 (3.00%)   | 0 (0.00%) | 1 (6.67%)   | 3 (2.48%)   | 0 (0.00%)   |     |
| unilateral                                   | 23 (12.2%)  | 19 (19.0%)  | 0 (0.00%) | 0 (0.00%)   | 21 (17.4%)  | 3 (5.77%)   |     |
| Venturi mask                                 | 35 (18.5%)  | 12 (12.4%)  | 0 (.)     | 1 (100%)    | 0 (.)       | 0 (.)       | 287 |
| <b>Measures at hospitalization</b>           |             |             |           |             |             |             |     |
| Breathing frequency (n/min)                  | 23.9 (6.31) | 25.0 (5.66) | -         | -           | 27.2 (7.05) | 23.0 (4.24) | 24  |
| Diastolic blood pressure (mmHg)              | 72.3 (21.5) | 72.0 (23.3) | 73.0 (.)  | 68.6 (31.7) | 73.8 (20.8) | 70.7 (20.5) | 452 |
| Heart rate (n/min)                           | 95.2 (98.6) | 89.4 (17.6) | 110 (.)   | 84.5 (19.2) | 86.6 (14.8) | 119 (186)   | 462 |
| Systolic blood pressure (mmHg)               | 133 (48.4)  | 138 (63.9)  | 117 (.)   | 136 (19.1)  | 130 (21.8)  | 139 (85.4)  | 446 |
| Temperature (°C)                             | 36.8 (0.80) | 36.9 (0.75) | 37.2 (.)  | 36.9 (0.87) | 36.7 (0.71) | 36.9 (0.95) | 447 |
| <b>Symptoms</b>                              |             |             |           |             |             |             |     |
| Conjunctival congestion                      | 0 (0.00%)   | 0 (0.00%)   | 0 (0.00%) | 0 (0.00%)   | 0 (0.00%)   | 0 (0.00%)   | 478 |
| Cough                                        | 135 (71.4%) | 71 (71.0%)  | 1 (100%)  | 8 (53.3%)   | 93 (76.9%)  | 31 (59.6%)  | 478 |
| Disorientation                               | 4 (2.12%)   | 1 (1.00%)   | 0 (0.00%) | 0 (0.00%)   | 4 (3.31%)   | 1 (1.92%)   | 478 |
| Fatigue                                      | 55 (29.1%)  | 34 (34.0%)  | 0 (0.00%) | 4 (26.7%)   | 37 (30.6%)  | 15 (28.8%)  | 478 |
| Fever                                        | 150 (79.4%) | 84 (84.0%)  | 1 (100%)  | 10 (66.7%)  | 97 (80.2%)  | 41 (78.8%)  | 478 |
| Headache                                     | 27 (14.3%)  | 15 (15.0%)  | 0 (0.00%) | 0 (0.00%)   | 18 (14.9%)  | 10 (19.2%)  | 478 |
| Hemoptysis                                   | 1 (0.53%)   | 1 (1.00%)   | 0 (0.00%) | 0 (0.00%)   | 0 (0.00%)   | 1 (1.92%)   | 478 |
| Loss of consciousness                        | 4 (2.12%)   | 0 (0.00%)   | 0 (0.00%) | 0 (0.00%)   | 2 (1.65%)   | 2 (3.85%)   | 478 |
| Myalgia                                      | 40 (21.2%)  | 27 (27.0%)  | 0 (0.00%) | 3 (20.0%)   | 25 (20.7%)  | 11 (21.2%)  | 478 |
| Nasal congestion                             | 2 (1.06%)   | 2 (2.00%)   | 0 (0.00%) | 0 (0.00%)   | 1 (0.83%)   | 1 (1.92%)   | 478 |
| Nausea                                       | 15 (7.94%)  | 5 (5.00%)   | 1 (100%)  | 2 (13.3%)   | 9 (7.44%)   | 4 (7.69%)   | 478 |
| Odynophagia                                  | 13 (6.88%)  | 7 (7.00%)   | 1 (100%)  | 2 (13.3%)   | 6 (4.96%)   | 3 (5.77%)   | 478 |
| Oropharyngeal congestion                     | 2 (1.06%)   | 1 (1.00%)   | 0 (0.00%) | 0 (0.00%)   | 0 (0.00%)   | 1 (1.92%)   | 478 |
| Shaking chills                               | 19 (10.1%)  | 11 (11.0%)  | 0 (0.00%) | 1 (6.67%)   | 13 (10.7%)  | 4 (7.69%)   | 478 |

|          | AC1            |           |              | RE1       |           |           |     |
|----------|----------------|-----------|--------------|-----------|-----------|-----------|-----|
|          | Acute<br>phase | (0,7]     | (7,14]       | (14,30]   | (30,60]   | >60       | N   |
| Vomiting | 7 (3.70%)      | 2 (2.00%) | 0<br>(0.00%) | 0 (0.00%) | 6 (4.96%) | 1 (1.92%) | 478 |

**Table S3.** General characteristics and metadata for the different cohorts of healthy controls (HC, HC1 and HCV1) and people that non-hospitalized recovered individuals (NHR1, NHRV1).

|                                                  | HC<br>N=8664    | HC1<br>N=238 | HCV1<br>N=2322  | NHR1<br>N=95 | NHRV1<br>N=418 | N     |
|--------------------------------------------------|-----------------|--------------|-----------------|--------------|----------------|-------|
| <b>General</b>                                   |                 |              |                 |              |                |       |
| Age (years)                                      | 43.3 (9.18)     | 36.6 (9.26)  | 44.7 (9.17)     | 37.5 (10.3)  | 42.9 (10.3)    | 11737 |
| Gender (female, n)                               | 3172<br>(36.6%) | 131 (55.0%)  | 963 (41.5%)     | 39 (41.1%)   | 182 (43.5%)    | 11737 |
| Smoker                                           | 1744<br>(20.2%) | 62 (26.1%)   | 470 (20.3%)     | 17 (18.3%)   | 48 (11.6%)     | 11683 |
| <b>Measures</b>                                  |                 |              |                 |              |                |       |
| Body mass index (kg/m <sup>2</sup> )             | 25.4 (3.81)     | 24.2 (3.95)  | 25.4 (4.58)     | 24.8 (3.95)  | 25.6 (4.17)    | 11567 |
| Height (cm)                                      | 172 (9.01)      | 170 (9.42)   | 171 (9.10)      | 171 (9.25)   | 171 (9.28)     | 11593 |
| Weight (kg)                                      | 75.5 (14.2)     | 70.3 (14.0)  | 74.6 (15.1)     | 73.0 (14.0)  | 75.4 (14.9)    | 11600 |
| <b>Questionnaire</b>                             |                 |              |                 |              |                |       |
| Diabetes                                         | 73 (3.13%)      | 0 (.)        | 0 (.)           | 0 (.)        | 0 (.)          | 2335  |
| Hypertension                                     | 955 (11.6%)     | 3 (1.29%)    | 155 (6.75%)     | 5 (5.32%)    | 33 (7.97%)     | 11279 |
| Do physical exercise                             | 6485<br>(75.2%) | 188 (79.0%)  | 1764<br>(76.6%) | 77 (84.6%)   | 329 (79.5%)    | 11664 |
| <b>COVID</b>                                     |                 |              |                 |              |                |       |
| Days from COVID onset                            |                 |              |                 |              |                | 513   |
| (0,7]                                            | -               | -            | -               | 0 (0.00%)    | 1 (0.24%)      |       |
| (7,14]                                           | -               | -            | -               | 1 (1.05%)    | 2 (0.48%)      |       |
| (14,30]                                          | -               | -            | -               | 0 (0.00%)    | 8 (1.91%)      |       |
| (30,60]                                          | -               | -            | -               | 16 (16.8%)   | 27 (6.46%)     |       |
| >60                                              | -               | -            | -               | 78 (82.1%)   | 380 (90.9%)    |       |
| COVID vaccine dosis                              |                 |              |                 |              |                | 11489 |
| 0                                                | 8416 (100%)     | 238 (100%)   | 0 (0.00%)       | 95 (100%)    | 0 (0.00%)      |       |
| 1                                                | 0 (0.00%)       | 0 (0.00%)    | 471 (20.3%)     | 0 (0.00%)    | 340 (81.3%)    |       |
| 2                                                | 0 (0.00%)       | 0 (0.00%)    | 1851<br>(79.7%) | 0 (0.00%)    | 78 (18.7%)     |       |
| Vaccine: Astra Zeneca                            | 0 (0.00%)       | 0 (0.00%)    | 101 (4.35%)     | 0 (0.00%)    | 10 (2.39%)     | 11737 |
| Vaccine: Janssen                                 | 0 (0.00%)       | 0 (0.00%)    | 209 (9.00%)     | 0 (0.00%)    | 35 (8.37%)     | 11737 |
| Vaccine: Moderna                                 | 0 (0.00%)       | 0 (0.00%)    | 189 (8.14%)     | 0 (0.00%)    | 34 (8.13%)     | 11737 |
| Vaccine: Pfizer                                  | 0 (0.00%)       | 0 (0.00%)    | 1739<br>(74.9%) | 0 (0.00%)    | 319 (76.3%)    | 11737 |
| <b>Symptoms</b>                                  |                 |              |                 |              |                |       |
| Allergy                                          | 0 (.)           | 20 (95.2%)   | 134 (88.2%)     | 8 (100%)     | 17 (94.4%)     | 199   |
| Diarrhea                                         | 0 (.)           | 18 (94.7%)   | 133 (88.7%)     | 22 (100%)    | 28 (93.3%)     | 221   |
| Drycough                                         | 0 (.)           | 15 (93.8%)   | 94 (83.9%)      | 20 (100%)    | 51 (96.2%)     | 201   |
| Fatigue                                          | 0 (.)           | 9 (90.0%)    | 55 (75.3%)      | 17 (100%)    | 44 (95.7%)     | 146   |
| Fever                                            | 0 (.)           | 9 (90.0%)    | 96 (85.7%)      | 27 (100%)    | 51 (96.2%)     | 202   |
| Headache                                         | 0 (.)           | 53 (98.1%)   | 399 (97.1%)     | 33 (100%)    | 106 (100%)     | 604   |
| Musclepain                                       | 0 (.)           | 32 (97.0%)   | 265 (95.0%)     | 36 (100%)    | 87 (97.8%)     | 437   |
| Nasalcongestion                                  | 0 (.)           | 52 (96.3%)   | 391 (95.8%)     | 34 (97.1%)   | 83 (97.6%)     | 582   |
| Sorethroat                                       | 0 (.)           | 36 (97.3%)   | 186 (91.2%)     | 18 (100%)    | 56 (96.6%)     | 317   |
| <b>Biochemical</b>                               |                 |              |                 |              |                |       |
| Alkaline phosphatase (U/L)                       | 73.4 (25.8)     | -            | -               | -            | -              | 221   |
| Alanine transaminase (U/L)                       | 22.7 (13.7)     | 18.6 (17.7)  | 21.8 (12.5)     | 22.0 (17.1)  | 21.8 (11.1)    | 11567 |
| Aspartate transaminase (U/L)                     | 37.3 (45.3)     | -            | -               | -            | -              | 531   |
| Basophils(10 <sup>9</sup> /L)                    | 0.04 (0.02)     | 0.04 (0.02)  | 0.04 (0.02)     | 0.04 (0.02)  | 0.03 (0.02)    | 11734 |
| Bilirubin (mg/dL)                                | 0.61 (0.38)     | -            | -               | -            | -              | 240   |
| HDL Cholesterol (mg/dL)                          | 60.6 (15.7)     | 67.3 (28.5)  | 62.4 (15.5)     | 65.2 (23.4)  | 63.9 (18.4)    | 11568 |
| LDL Cholesterol (mg/dL)                          | 113 (30.6)      | 106 (31.3)   | 116 (30.3)      | 110 (29.1)   | 113 (30.5)     | 10928 |
| Cholesterol (mg/dL)                              | 194 (34.3)      | 186 (35.1)   | 198 (34.2)      | 189 (34.0)   | 195 (35.1)     | 11568 |
| Non-HDL Cholesterol (mg/dL)                      | 133 (35.9)      | 123 (36.6)   | 136 (35.8)      | 126 (32.4)   | 132 (35.0)     | 11568 |
| Mean corpuscular hemoglobin concentration (g/dL) | 33.9 (0.87)     | 33.4 (1.00)  | 33.5 (1.05)     | 33.5 (1.12)  | 33.6 (1.07)    | 11734 |

|                                   | HC<br>N=8664 | HC1<br>N=238 | HCV1<br>N=2322 | NHR1<br>N=95 | NHRV1<br>N=418 | N     |
|-----------------------------------|--------------|--------------|----------------|--------------|----------------|-------|
| Mean corpuscular volume (fL)      | 90.1 (4.28)  | 90.4 (4.53)  | 90.4 (4.41)    | 90.3 (4.05)  | 90.1 (4.60)    | 11734 |
| Creatinine (mg/dL)                | 0.87 (0.16)  | 0.83 (0.16)  | 0.86 (0.16)    | 0.86 (0.16)  | 0.87 (0.16)    | 11568 |
| Eosinophils (10 <sup>9</sup> /L)  | 0.23 (0.16)  | 0.22 (0.17)  | 0.23 (0.16)    | 0.24 (0.16)  | 0.21 (0.15)    | 11734 |
| Erythrocytes (10 <sup>9</sup> /L) | 4.84 (0.42)  | 4.67 (0.43)  | 4.78 (0.42)    | 4.75 (0.36)  | 4.78 (0.41)    | 11734 |
| ESR (mm/h)                        | 7.97 (5.47)  | 7.71 (4.79)  | 7.56 (5.00)    | 7.33 (4.61)  | 7.51 (4.73)    | 11634 |
| Fe (µg/dL)                        | 72.0 (40.8)  | -            | -              | -            | -              | 173   |
| Ferritin (ng/mL)                  | 74.1 (110)   | -            | -              | -            | -              | 254   |
| Fructosamine (µmol/L)             | 258 (48.7)   | -            | -              | -            | -              | 203   |
| Gamma-glutamyltransferase (U/L)   | 22.5 (20.6)  | 15.9 (11.0)  | 21.3 (20.4)    | 19.1 (15.0)  | 19.9 (14.6)    | 11566 |
| Glucose (mg/dL)                   | 86.3 (12.4)  | 84.7 (13.5)  | 87.7 (14.5)    | 87.5 (23.6)  | 87.9 (11.7)    | 11568 |
| Hematocrit (%)                    | 43.5 (3.13)  | 42.1 (3.18)  | 43.1 (3.35)    | 42.8 (3.00)  | 42.9 (3.14)    | 11734 |
| Hemoglobin (g/dL)                 | 14.8 (1.21)  | 14.1 (1.23)  | 14.4 (1.28)    | 14.4 (1.23)  | 14.4 (1.20)    | 11734 |
| Leukocytes (10 <sup>9</sup> /L)   | 6.73 (1.71)  | 6.81 (2.00)  | 6.67 (1.73)    | 6.49 (1.47)  | 6.46 (1.48)    | 11734 |
| Lymphocytes (10 <sup>9</sup> /L)  | 2.34 (0.67)  | 2.31 (0.68)  | 2.31 (0.70)    | 2.14 (0.52)  | 2.29 (0.62)    | 11734 |
| Monocytes (10 <sup>9</sup> /L)    | 0.62 (0.19)  | 0.61 (0.22)  | 0.64 (0.31)    | 0.57 (0.17)  | 0.62 (0.28)    | 11734 |
| Neutrophils (10 <sup>9</sup> /L)  | 3.50 (1.26)  | 3.62 (1.57)  | 3.45 (1.39)    | 3.50 (1.23)  | 3.32 (1.19)    | 11734 |
| Mean platelet volume (fL)         | 8.40 (0.69)  | 8.50 (0.70)  | 8.53 (0.73)    | 8.49 (0.68)  | 8.58 (0.71)    | 11733 |
| Platelets (10 <sup>9</sup> /L)    | 238 (51.9)   | 245 (58.1)   | 234 (50.4)     | 239 (54.0)   | 232 (50.1)     | 11734 |
| Red cell distribution (U)         | 13.3 (0.79)  | 13.4 (0.99)  | 13.5 (0.91)    | 13.4 (0.93)  | 13.4 (0.84)    | 11734 |
| Transferrin (mg/dL)               | 283 (58.8)   | -            | -              | -            | -              | 172   |
| Triglycerides (mg/dL)             | 98.4 (63.5)  | 84.0 (46.8)  | 96.7 (70.1)    | 87.5 (42.1)  | 95.7 (63.4)    | 11568 |
| Urate (mg/dL)                     | 5.13 (1.27)  | 4.80 (1.31)  | 5.18 (1.33)    | 5.26 (1.26)  | 5.33 (1.42)    | 11568 |



**Table S4.** Main performance metrics for COVID model. Cross-validation uses 10 repetitions of 5-fold; reported values are average and 95% confidence intervals (CI) for test subset. Permutation tests with 100 runs were used to estimate p-values.

| Performance metric | Full model<br><i>value (p-value)</i> | Cross-validation<br><i>mean [95% CI] (p-value)</i> |
|--------------------|--------------------------------------|----------------------------------------------------|
| AUC                | 0.998 (p <0.01)                      | 0.998 [0.995, 0.999] (p <0.01)                     |
| Sensitivity        | 0.985 (p <0.01)                      | 0.989 [0.970, 0.997] (p <0.01)                     |
| Specificity        | 0.983 (p <0.01)                      | 0.983 [0.972, 0.994] (p <0.01)                     |

**Table S5.** Main performance metrics for COVID lineage model. Cross-validation uses 10 repetitions of 5-fold; reported values are average and 95% confidence intervals (CI) for test subset. Permutation tests with 100 runs were used to estimate p-values.

| Performance metric | Full model<br><i>value (p-value)</i> | Cross-validation<br><i>mean [95% CI] (p-value)</i> |
|--------------------|--------------------------------------|----------------------------------------------------|
| AUC                | 0.922 (p <0.01)                      | 0.907 [0.821, 0.971] (p <0.01)                     |
| Sensitivity        | 0.887 (p = 0.01)                     | 0.908 [0.783, 1.000] (p <0.01)                     |
| Specificity        | 0.861 (p <0.01)                      | 0.847 [0.662, 0.990] (p <0.01)                     |

**Table S6.** Main performance metrics for age-gender balanced COVID model. Cross-validation uses 10 repetitions of 5-fold; reported values are average and 95% confidence intervals (CI) for test subset. Permutation tests with 100 runs were used to estimate p-values.

| Performance metric | Full model<br><i>value (p-value)</i> | Cross-validation<br><i>mean [95% CI] (p-value)</i> |
|--------------------|--------------------------------------|----------------------------------------------------|
| AUC                | 0.997 (p <0.01)                      | 0.996 [0.990, 1.000] (p <0.01)                     |
| Sensitivity        | 0.981 (p <0.01)                      | 0.986 [0.959, 1.000] (p <0.01)                     |
| Specificity        | 0.980 (p <0.01)                      | 0.980 [0.950, 1.000] (p <0.01)                     |

**Figure S1.** Principal Component Analysis (PCA) score plot showing the first and second components that explains the maximum variability (19.7% and 15.1% respectively) of metabolomics data from acute patients at different hospitals. Ellipses represent the 95% confidence intervals.

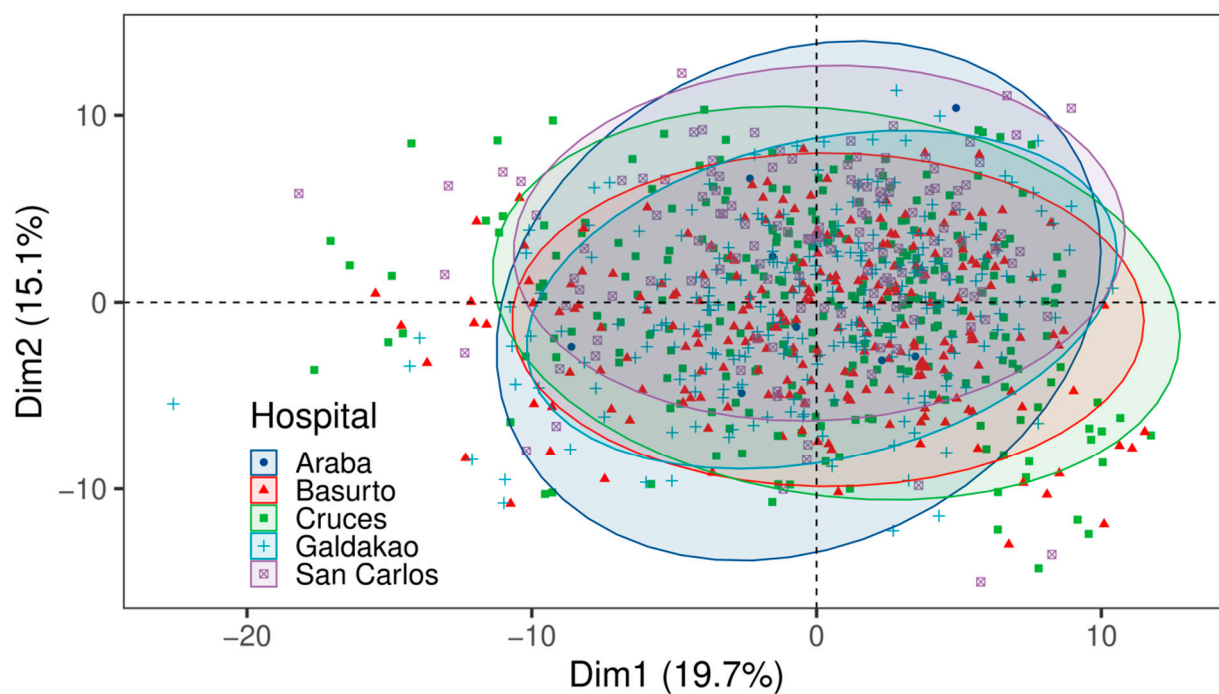

**Figure S2.** Concentration of chemokines and cytokines that are already associated to the COVID-19 immunological response in different time periods from disease onset (in days) and compared to healthy cohort (HC). Statistically significant comparisons (unadjusted p-value < 0.05) versus HC group are marked with asterisks (\*: p-value < 0.05; \*\*: p-value < 0.01; \*\*\*: p-value < 0.001; \*\*\*\*: p-value < 0.0001).

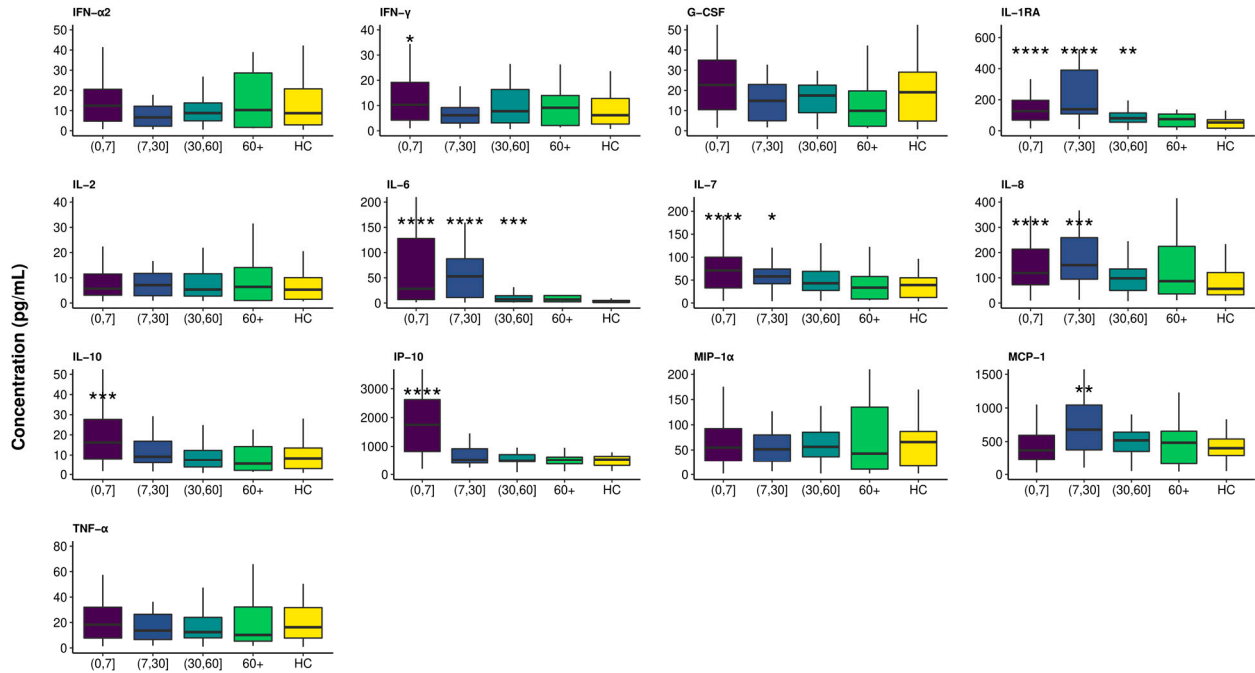

**Figure S3.** O-PLS-DA score plot from COVID model with the projection of non-hospitalized recovered (NHR) people (triangles). Those NHR people whose disease onset is less than 1 month are represented in orange.

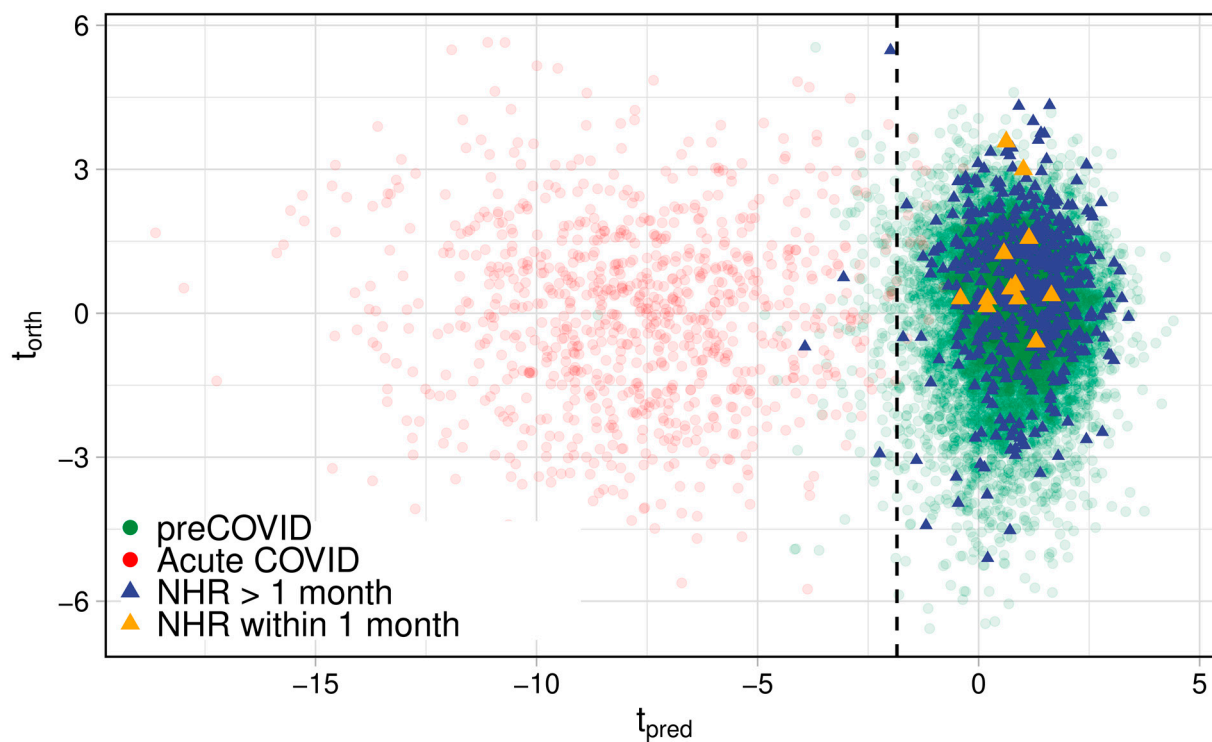

**Figure S4.** Comparison of inflammation markers, cytokine and chemokine levels of non-hospitalized recovered (NHR) group within 1.5 months from COVID onset versus controls (HC). The horizontal position of each point represents the size effect in the comparison as the binary logarithm of fold-change (mean in NHR group divided by mean of control group); its horizontal line is the associated standard error. If the difference is statistically significant (unadjusted p-value < 0.05) the point is filled.

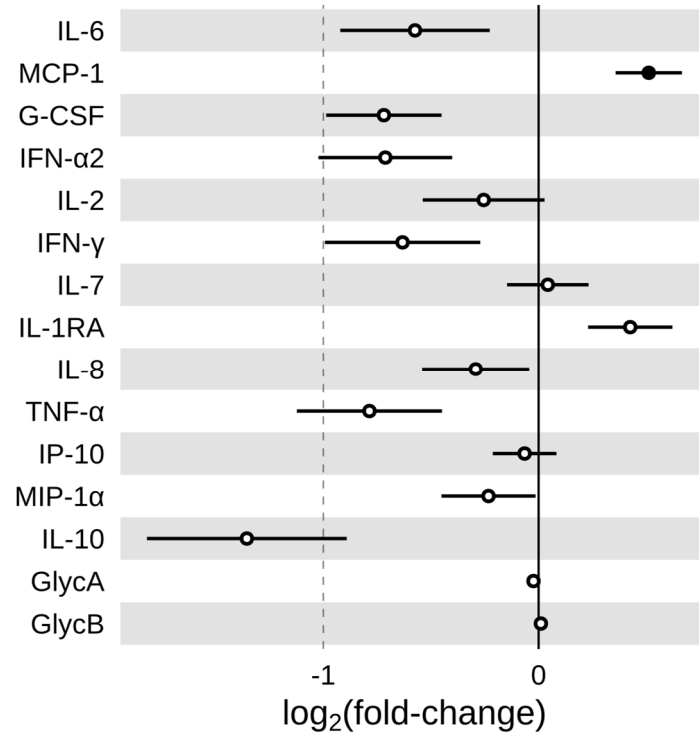

**Figure S5.** Concentration evolution for the 38 metabolomic parameters used to build the COVID model. Evolution goes from acute phase (AC) through the different recovery periods (RE). Non-hospitalized recovered (NHR) people are included at the end as reference. Horizontal dashed line shows the mean concentration in control group (HC). Each point represents the mean value, standard errors are included as vertical lines. Concentration units: mmol/L (2-Hydroxybutyric acid, 2-Oxoglutaric acid, Acetoacetic acid, Acetone, Choline, Citric acid, Creatine, Formic acid, Glucose, Glutamic acid, Glutamine, Histidine, Lactic acid, Lysine, Phenylalanine, Pyruvic acid), mg/dL (HDL-1 Free Cholesterol, HDL-2 Triglycerides, HDL-3 Apo-A2, HDL-3 Free Cholesterol, HDL-4 Apo-A1, HDL-4 Triglycerides, LDL Triglycerides, LDL-1 Cholesterol, LDL-2 Triglycerides, LDL-3 Cholesterol, LDL-4 Cholesterol, LDL-5 Free Cholesterol, LDL-6 Triglycerides, Total Cholesterol, VLDL-4 Triglycerides, VLDL-5 Free Cholesterol) and arbitrary units (ratios, GlycA and GlycB).

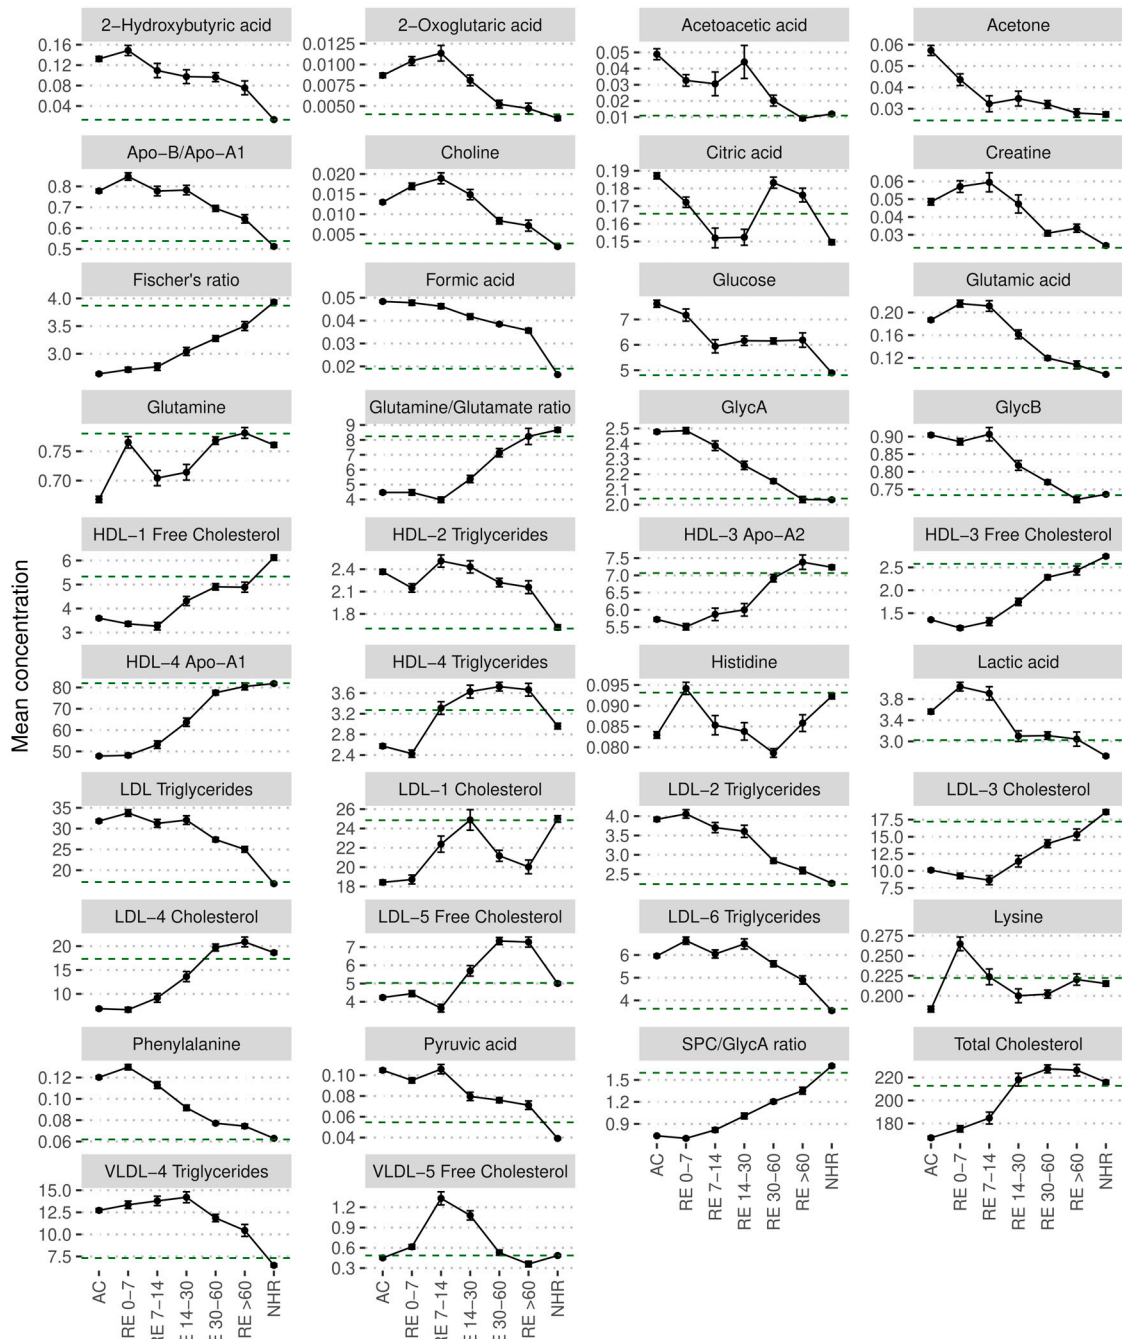

**Figure S6.** Comparison of acute COVID and the different recovery stages versus the control group (HC) for each analyzed metabolic parameter. The horizontal position of each point represents the size effect in the comparison in standard deviation (SD) units; its horizontal line is the associated standard error. If the difference is statistically significant (p-value < 0.05 after FDR correction) the point is filled.

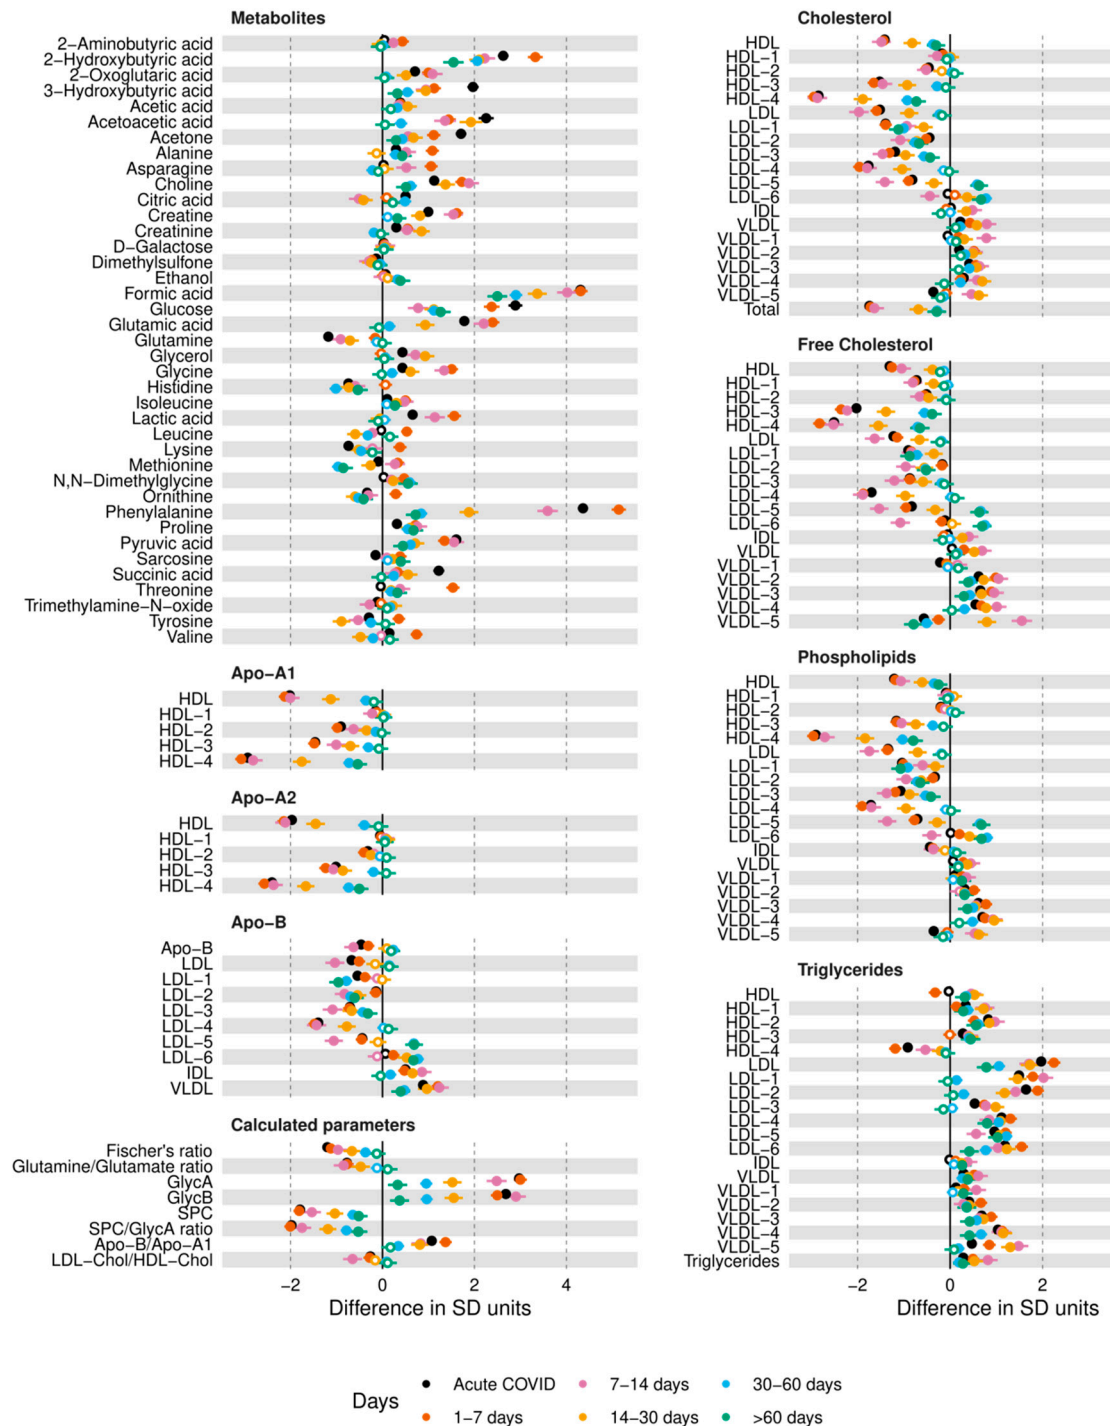

**Figure S7.** Effect of vaccination between HCV1 and HC1 cohorts for each analyzed metabolic parameter. The horizontal position of each point represents the size effect in the comparison in standard deviation (SD) units; its horizontal line is the associated standard error. If the difference is statistically significant (p-value < 0.05 after FDR correction) the point is filled.

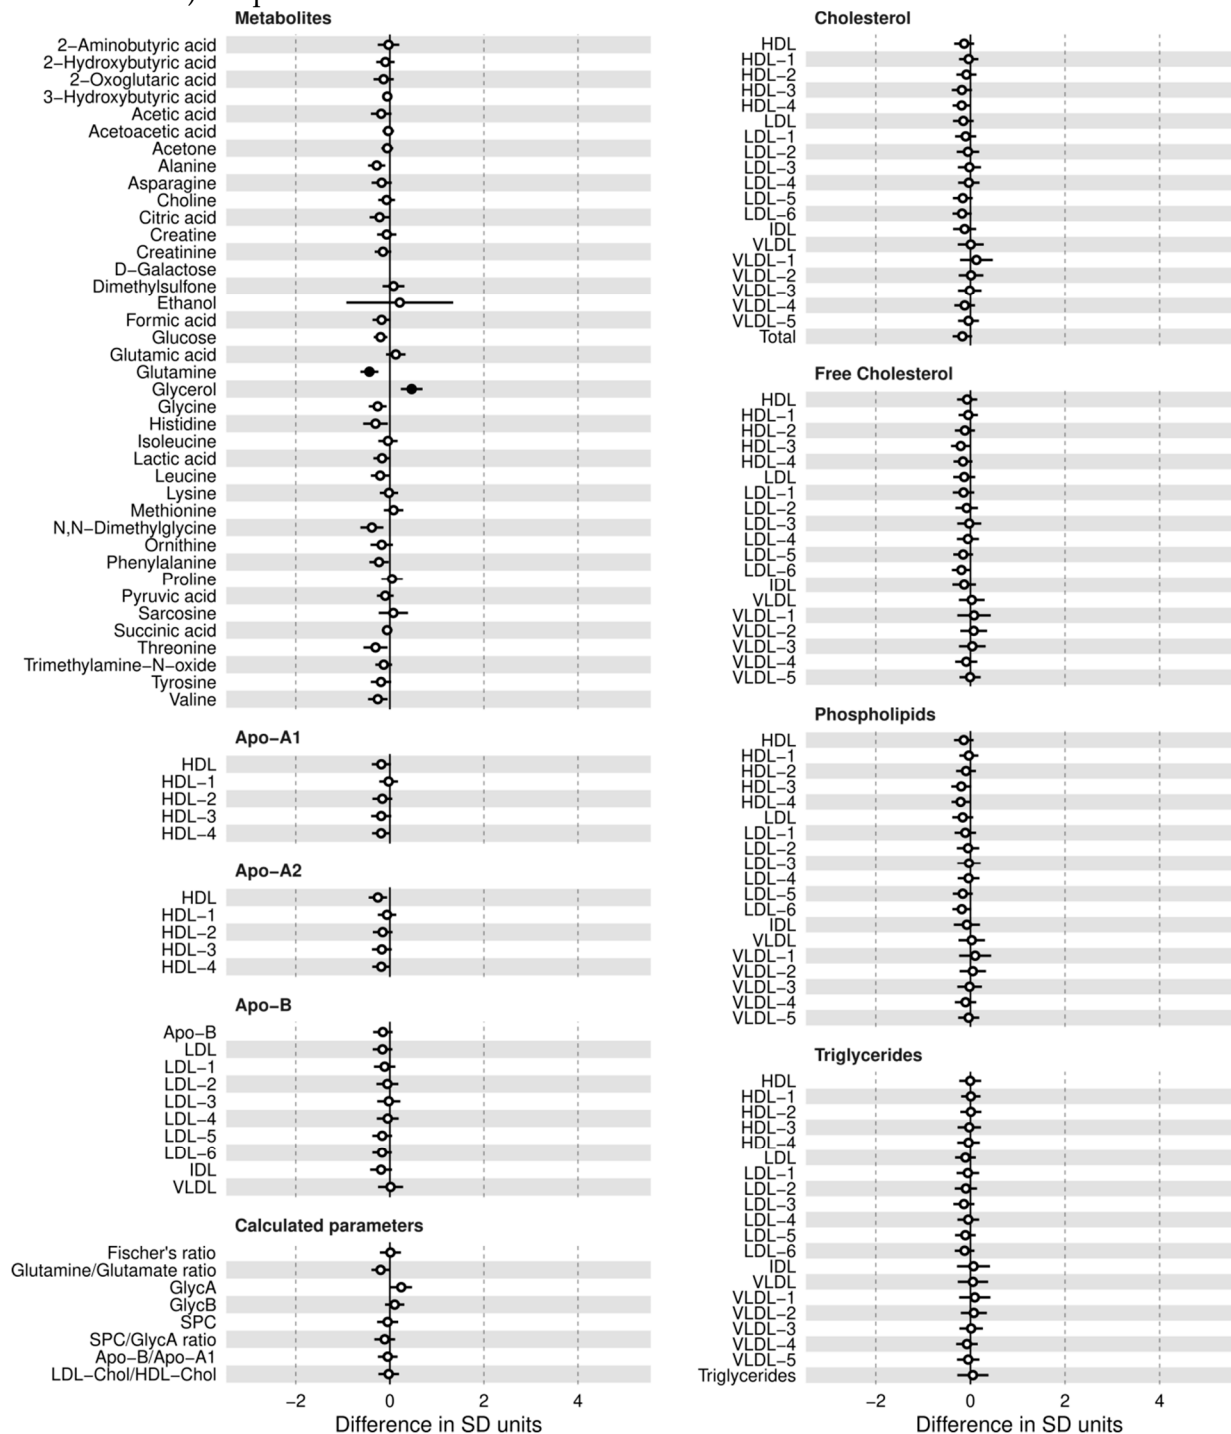



**Figure S8.** Violin plots showing the effect of vaccines by type for the concentration of Glutamine and Glycerol compared to people without vaccination (none). Horizontal bars indicate statistical significance according to p-value from Student's t tests. ns: non-significant; \*: p-value < 0.05; \*\*: p-value < 0.01

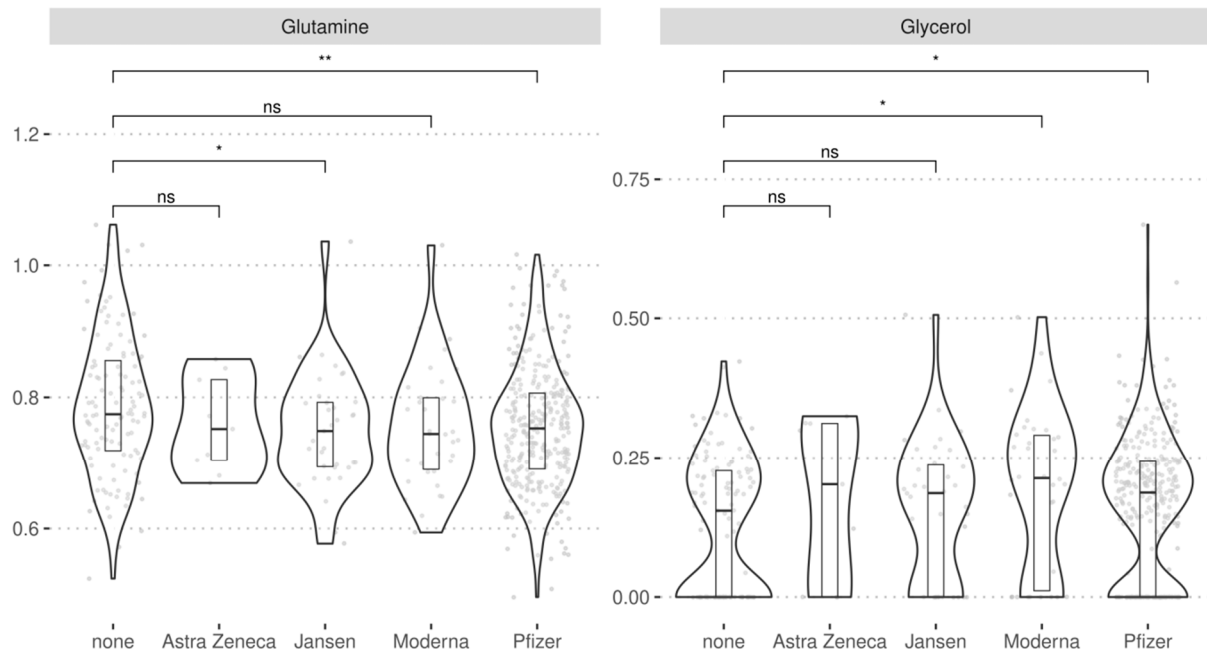

**Figure S9.** COVID model using a subset of acute COVID (AC) and control cohorts (HC) that have been matched between them by gender and age. A) Score plot from O-PLS-DA model showing the discrimination between COVID and controls. The vertical dashed line indicates the threshold that maximized the Youden's index in receiver operating characteristic (ROC) analysis. B) ROC curve for model shown in figure S9A. The area under the curve (AUC) is 0.997. In red it is indicated the  $t_{pred}$  value that maximizes the Youden's index, and the resulting specificity and sensitivity between parenthesis. C) Distribution of gender and number of samples by subcohort. D) Distribution of ages by gender and subcohort.

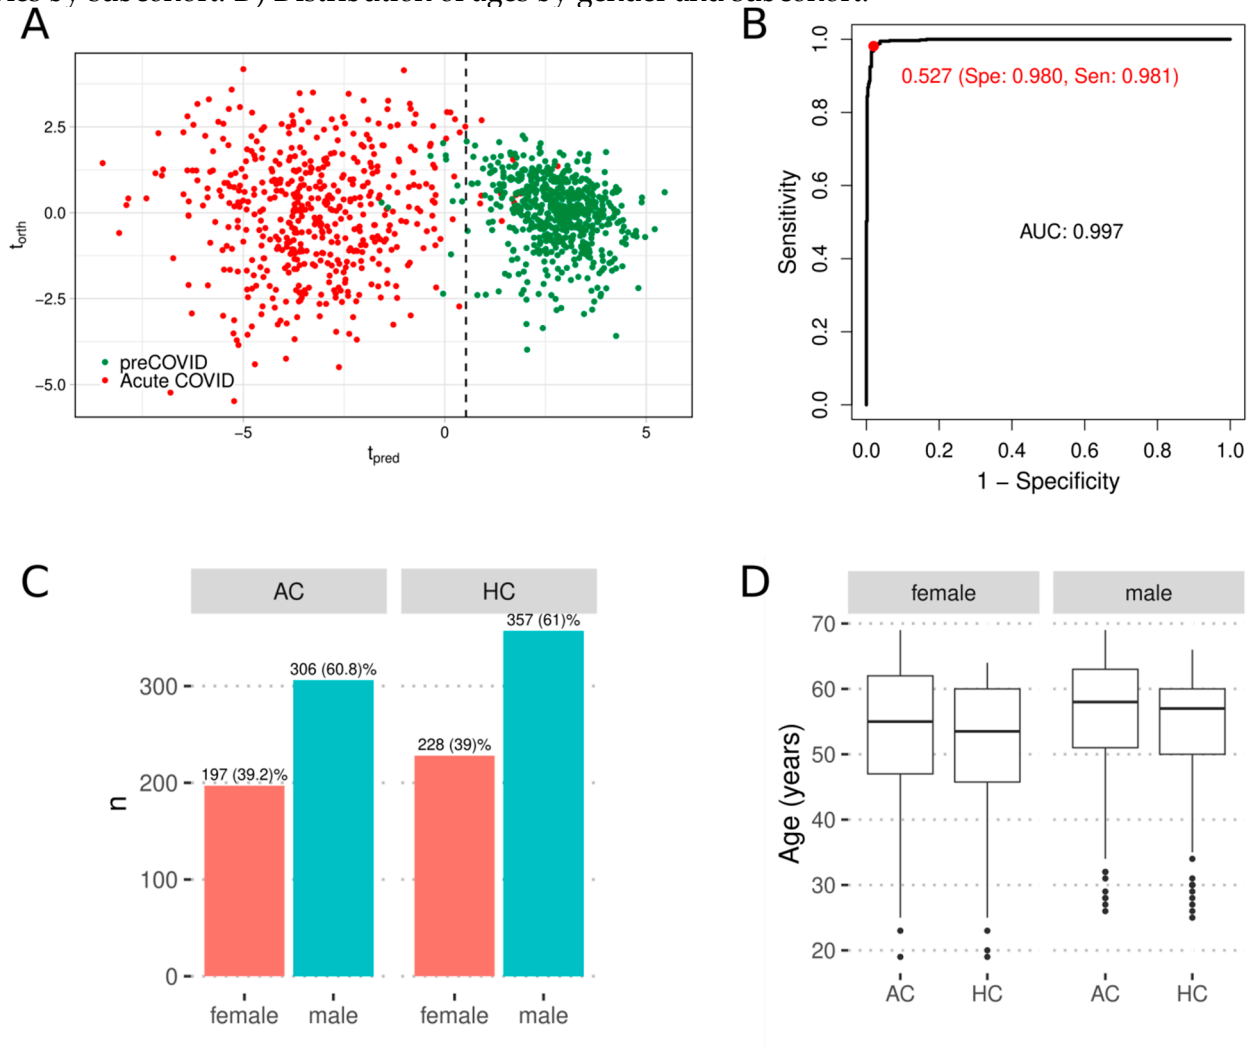

**Figure S10.** Comparison of O-PLS-DA loadings from predictive components of two COVID models by gender: one using only women and other using only men.

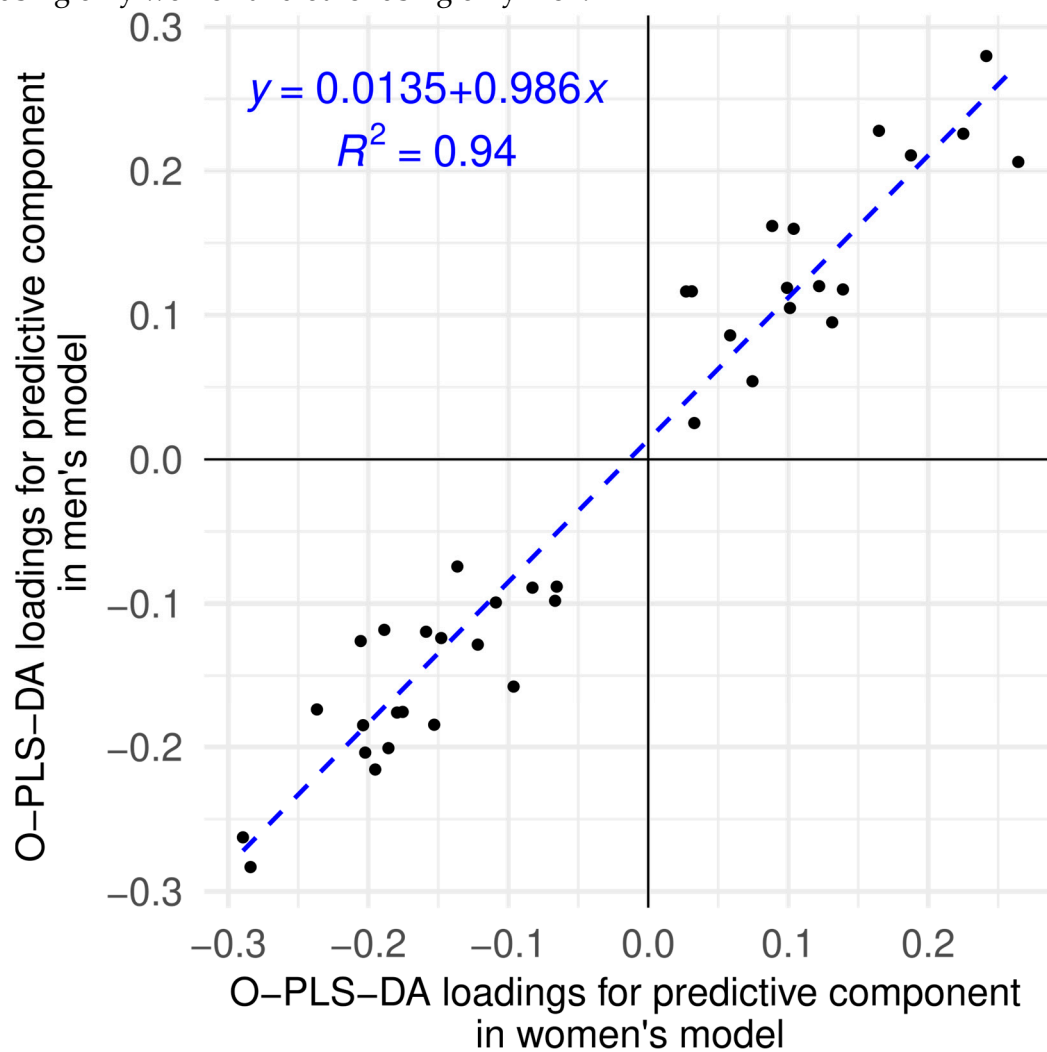

**Figure S11.** Estimation of the effect of medication in COVID acute patients after 1-2 days at hospital as compared versus initial collected sample at hospitalization. The horizontal position of each point represents the size effect in the comparison in standard deviation (SD) units; its horizontal line is the associated standard error. If the difference is statistically significant ( $p$ -value  $< 0.05$  after FDR correction) the point is filled.

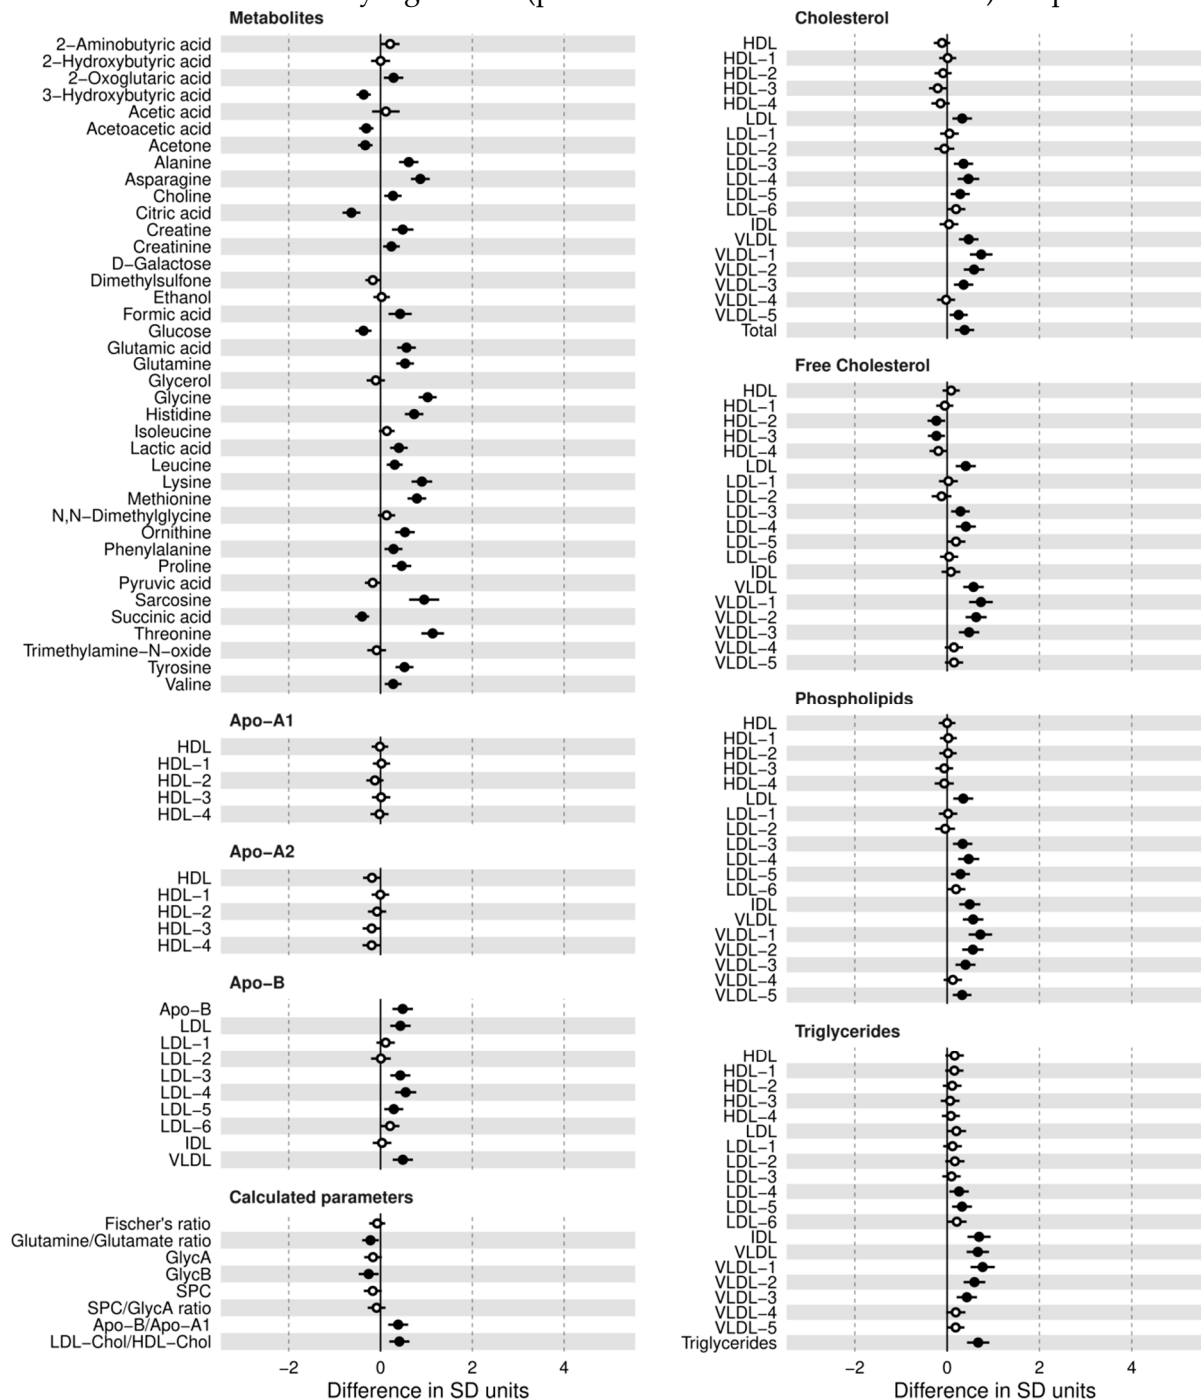

**Figure S12.** Estimation of the effect of medication on cytokine and chemokine levels for COVID acute patients after 1-2 days at hospital as compared versus initial collected sample at hospitalization. The horizontal position of each point represents the size effect in the comparison as the binary logarithm of fold-change (mean in mild group divided by mean of control group); its horizontal line is the associated standard error. If the difference is statistically significant (unadjusted p-value < 0.05) the point is filled.

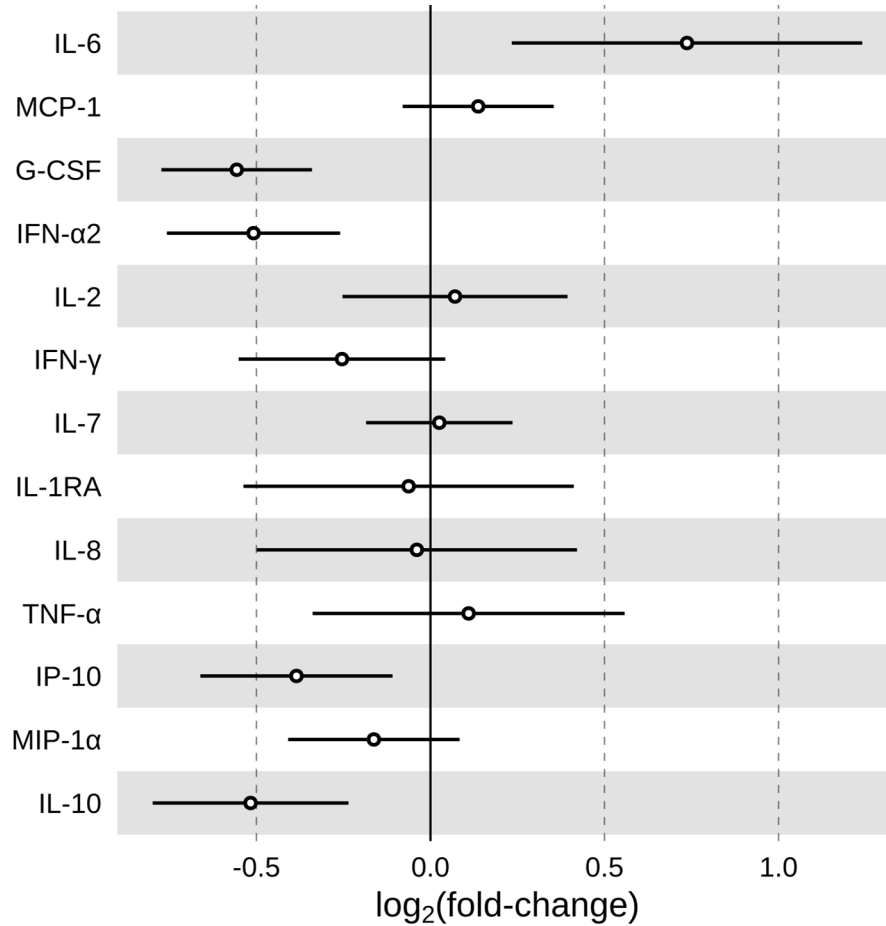

Supplement: s1 [file s1]
